# Supplementary material
Source: PubMed Central journal article supplement (PMC3919464)
Supplement: NIHMS540435-supplement-1_si_001.pdf [file NIHMS540435-supplement-1_si_001.pdf]

## **Biochemical and Functional Characterization of Charge-defined Subfractions of High-density Lipoprotein From Normal Adults**

Ju-Yi Hsieh,<sup>§,†</sup> Chiz-Tzung Chang,<sup>§,†,‡</sup> Max T. Huang,<sup>||</sup> Chia-Ming Chang,<sup>†</sup> Chia-Ying Chen,<sup>†</sup>

Ming-Yi Shen,<sup>†,#</sup> Hsin-Yi Liao,<sup>@</sup> Guei-Jane Wang,<sup>#, Δ,▽</sup> Chu-Huang Chen,<sup>\*,†,#,||,¶</sup> Chao-Jung

Chen,<sup>\*,@,⊥</sup> and Chao-Yuh Yang<sup>\*,†,#,||,¶</sup>

<sup>†</sup>L5 Research Center, Medical Research Department, China Medical University Hospital, 2 Yude Road, North District, Taichung, 40447, Taiwan

<sup>‡</sup>College of Medicine, China Medical University, Taichung, 40402, Taiwan

<sup>||</sup>Section of Atherosclerosis and Lipoprotein Research, Department of Medicine, Baylor College of Medicine, Houston, Texas 77030, United States

<sup>#</sup>Graduate Institute of Clinical Medical Science, China Medical University, Taichung, 40402, Taiwan

<sup>@</sup>Proteomics Core Laboratory, Department of Medical Research, China Medical University Hospital, Taichung, 40402, Taiwan

<sup>Δ</sup>Department of Medical Research, China Medical University Hospital, Taichung, 40402, Taiwan

<sup>▽</sup>Department of Health and Nutrition Biotechnology, Asia University, Taichung 41354, Taiwan

<sup>¶</sup>Vascular and Medicinal Research, Texas Heart Institute, Houston, Texas 77030, United States

<sup>⊥</sup>Graduate Institute of Integrated Medicine, China Medical University, Taichung, 40402, Taiwan

**Contents of Supporting Information:**

Table S-1: NanoLC-MS/MS analysis of the iTRAQ-labeled peptides detected in HDL subfractions

Table S-2: Molecular functions of the iTRAQ-labeled proteins identified by nanoLC-MS/MS

Experimental Section: Protein Digestion and iTRAQ Labeling

NanoLC-MS/MS

Protein Identification and Quantification

**Table S-1.** NanoLC-MS/MS analysis of the iTRAQ-labeled peptides detected in HDL subfractions

| Accession   | Protein                                                     | MW (kDa) | pI   | Scores | SC (%) | H1/H3 | H2/H3 | H4/H3 | H5/H3 | H4/H1 | H5/H1 |
|-------------|-------------------------------------------------------------|----------|------|--------|--------|-------|-------|-------|-------|-------|-------|
| A1AG2_HUMAN | Alpha-1-acid glycoprotein 2                                 | 23.6     | 23.7 | 31.1   | 4.5    | 0.71  | 0.84  | 2.02  | 2.5   | 2.82  | 3.51  |
| A1AT_HUMAN  | Alpha-1-antitrypsin                                         | 46.7     | 5.3  | 2095.1 | 42.3   | 0.61  | 1.49  | 1     | 1.39  | 1.65  | 2.29  |
| A2AP_HUMAN  | Alpha-2-antiplasmin                                         | 54.5     | 5.9  | 160.8  | 5.3    | 0.40  | 0.82  | 1.1   | 1.18  | 2.75  | 2.97  |
| ABCD3_HUMAN | ATP-binding cassette                                        | 75.4     | 9.9  | 30.4   | 1.4    | 1.31  | 0.69  | 0.9   | NA    | 0.69  | NA    |
| ACACB_HUMAN | Acetyl-CoA carboxylase 2                                    | 276.4    | 6.0  | 34.6   | 0.3    | 0.61  | 1.03  | 1.06  | NA    | 1.75  | NA    |
| ADCY9_HUMAN | Adenylate cyclase type 9                                    | 150.6    | 7.3  | 69.7   | 0.7    | 0.64  | 1.30  | 0.95  | NA    | 1.49  | NA    |
| ALBU_HUMAN  | Serum albumin                                               | 69.3     | 5.9  | 4282.5 | 67.0   | 0.88  | 1.30  | 0.38  | 2.08  | 0.45  | 2.35  |
| ANGT_HUMAN  | Angiotensinogen                                             | 53.1     | 5.9  | 127.2  | 4.9    | 0.36  | 0.95  | 1.27  | 1.31  | 3.54  | 3.65  |
| ANT3_HUMAN  | Antithrombin-III                                            | 52.6     | 6.3  | 78.0   | 3.9    | 0.84  | 0.98  | 1.65  | NA    | 1.96  | NA    |
| APBA2_HUMAN | Amyloid beta A4 precursor protein-binding family A member 2 | 82.5     | 4.6  | 35.5   | 2.4    | 1.28  | 1.15  | 0.4   | NA    | 0.31  | NA    |
| APC7_HUMAN  | Anaphase-promoting complex subunit 7                        | 66.8     | 5.3  | 30.6   | 3.0    | 0.78  | 1.56  | 0.75  | NA    | 0.97  | NA    |
| APOA1_HUMAN | Apolipoprotein A-I                                          | 30.8     | 5.5  | 8833.5 | 87.6   | 0.85  | 0.90  | 1.09  | 1.36  | 1.28  | 1.60  |
| APOA2_HUMAN | Apolipoprotein A-II                                         | 11.2     | 7.1  | 1101.6 | 69.0   | 0.43  | 1.47  | 0.29  | 0.52  | 0.67  | 1.20  |
| APOA_HUMAN  | Apolipoprotein(a)                                           | 501.0    | 5.5  | 606.2  | 4      | NA    | NA    | NA    | 3.19  | NA    | NA    |
| APOB_HUMAN  | Apolipoprotein B-100                                        | 515.3    | 6.6  | 4012.2 | 20.4   | 0.92  | 0.65  | 0.71  | 0.95  | 0.75  | 1.03  |
| APOC1_HUMAN | Apolipoprotein C-I                                          | 9.3      | 9.3  | 561.6  | 37.3   | 3.50  | 0.98  | 0.93  | 1.23  | 0.27  | 0.35  |
| APOC2_HUMAN | Apolipoprotein C-II                                         | 11.3     | 4.5  | 419.6  | 54.5   | 0.35  | 2.33  | 0.51  | 0.85  | 2.01  | 2.40  |
| APOC3_HUMAN | Apolipoprotein C-III                                        | 10.8     | 5.1  | 1055.0 | 58.6   | 0.25  | 1.12  | 0.23  | 0.69  | 0.96  | 2.81  |
| APOC4_HUMAN | Apolipoprotein C-IV                                         | 14.5     | 10.4 | 151.1  | 23.6   | 2.44  | 0.95  | 0.9   | 1.21  | 0.37  | 0.50  |
| APOD_HUMAN  | Apolipoprotein D                                            | 21.3     | 4.9  | 775.2  | 39.2   | 0.44  | 1.67  | 0.34  | 0.59  | 0.81  | 1.34  |
| APOE_HUMAN  | Apolipoprotein E                                            | 36.1     | 5.5  | 1803.2 | 60.9   | 0.57  | 0.56  | 1.38  | 1.51  | 2.41  | 2.63  |
| APOF_HUMAN  | Apolipoprotein F                                            | 35.4     | 5.3  | 123.6  | 7.7    | 0.47  | 1.08  | 0.99  | 3.86  | 2.10  | 8.18  |
| APOL1_HUMAN | Apolipoprotein L1                                           | 43.9     | 5.5  | 407.2  | 18.1   | 1.28  | 0.87  | 0.78  | 0.8   | 0.61  | 0.63  |
| APOM_HUMAN  | Apolipoprotein M                                            | 21.2     | 5.6  | 764.9  | 54.8   | 0.37  | 0.71  | 1.12  | 1.26  | 3.32  | 3.37  |

|             |                                                     |       |      |       |      |      |      |      |      |      |      |
|-------------|-----------------------------------------------------|-------|------|-------|------|------|------|------|------|------|------|
| BCAR1_HUMAN | Breast cancer anti-estrogen resistance protein 1    | 93.3  | 5.3  | 33.2  | 0.8  | 0.76 | 0.69 | 0.87 | 0.8  | 1.13 | 1.05 |
| CB047_HUMAN | Uncharacterized protein C2orf47, mitochondrial      | 32.5  | 10.1 | 32.6  | 2.7  | 0.58 | 0.94 | 1.24 | 2.13 | 2.15 | 3.70 |
| CENPF_HUMAN | Centromere protein F                                | 367.5 | 4.9  | 30.8  | 0.3  | 1.15 | 0.70 | 1.14 | NA   | 0.99 | NA   |
| CF163_HUMAN | Uncharacterized protein C6orf163                    | 38.5  | 6.5  | 33.6  | 2.4  | 1.08 | 0.47 | 0.96 | NA   | 0.88 | NA   |
| CHM4B_HUMAN | Charged multivesicular body protein 4b              | 24.9  | 4.6  | 35.0  | 3.1  | 0.81 | 1.16 | 0.87 | 0.94 | 1.07 | 1.16 |
| CI050_HUMAN | Uncharacterized protein C9orf50                     | 47.6  | 11.6 | 34.8  | 2.1  | 1.09 | 1.09 | 0.98 | 1.18 | 0.91 | 1.09 |
| CLUS_HUMAN  | Clusterin                                           | 52.5  | 5.9  | 514.7 | 23.8 | NA   | 0.83 | 1.54 | 2.82 | 3.51 | NA   |
| CNTRL_HUMAN | Centriolin                                          | 268.7 | 5.3  | 102.5 | 0.8  | 0.94 | 0.97 | 1.04 | NA   | 1.10 | NA   |
| CO3_HUMAN   | Complement C3                                       | 187.0 | 6.0  | 517.1 | 9.4  | 0.57 | 0.76 | 0.95 | 1.19 | 1.53 | 2.10 |
| CO4A_HUMAN  | Complement C4-A                                     | 192.7 | 6.7  | 378.6 | 5.5  | NA   | NA   | NA   | 2.66 | NA   | NA   |
| CP4V2_HUMAN | Cytochrome P450 4V2                                 | 60.7  | 7.8  | 39.3  | 1.1  | 0.49 | 0.99 | 0.39 | NA   | 0.80 | NA   |
| DESP_HUMAN  | Desmoplakin                                         | 331.6 | 6.4  | 30.4  | 0.2  | 0.79 | 0.83 | 1.03 | NA   | 1.30 | NA   |
| EFCB6_HUMAN | EF-hand calcium-binding domain-containing protein 6 | 172.8 | 9.5  | 33.3  | 0.5  | 1.45 | 0.61 | 2.07 | NA   | 1.42 | NA   |
| FAAH2_HUMAN | Fatty-acid amide hydrolase 2                        | 58.3  | 9.9  | 38.5  | 2.6  | 2.98 | 1.16 | 0.76 | NA   | 0.26 | NA   |
| FIBG_HUMAN  | Fibrinogen gamma chain                              | 51.5  | 5.3  | 45.2  | 3.3  | 1.04 | 0.84 | 0.99 | NA   | 0.96 | NA   |
| FIG4_HUMAN  | Polyphosphoinositide phosphatase                    | 103.6 | 6.5  | 30.3  | 1.1  | 0.46 | 0.85 | 0.88 | 0.83 | 1.92 | 1.80 |
| GRAM4_HUMAN | GRAM domain-containing protein 4                    | 66.4  | 9.6  | 30.5  | 1.2  | 0.84 | 0.53 | 0.27 | NA   | 0.32 | NA   |
| GXLT1_HUMAN | Glucoside xylosyltransferase 1                      | 50.5  | 9.7  | 32.0  | 3.0  | 0.39 | 2.38 | 0.44 | NA   | 1.13 | NA   |
| HERC6_HUMAN | Probable E3 ubiquitin-protein ligase HERC6          | 115.1 | 9.2  | 34.0  | 0.7  | 0.72 | 0.95 | 0.67 | NA   | 0.93 | NA   |
| HPT_HUMAN   | Haptoglobin                                         | 45.2  | 6.1  | 394.5 | 19.0 | 0.55 | 0.68 | 1.46 | 1.47 | 2.66 | 2.68 |
| HPTR_HUMAN  | Haptoglobin-related protein                         | 39.0  | 6.7  | 543.1 | 34.8 | 0.41 | 0.63 | 1.72 | 1.58 | 3.97 | 3.84 |
| IGHA1_HUMAN | Ig alpha-1 chain C region                           | 37.6  | 6.1  | 220.1 | 13.0 | 0.62 | 0.78 | 0.97 | 1.31 | 1.56 | 2.11 |
| IGHG1_HUMAN | Ig gamma-1 chain C region                           | 36.1  | 9.4  | 183.5 | 15.2 | 1.10 | 1.03 | 1.37 | 1.17 | 1.26 | 1.07 |
| IGHG2_HUMAN | Ig gamma-2 chain C region                           | 35.9  | 8.8  | 151.7 | 11.7 | 1.23 | 1.35 | 1.34 | 1.32 | 1.08 | 1.07 |
| IGHM_HUMAN  | Ig mu chain C region                                | 49.3  | 6.4  | 144.8 | 2    | NA   | NA   | NA   | 5.92 | NA   | NA   |

|               |                                                                                   |       |     |       |      |      |      |      |      |      |      |
|---------------|-----------------------------------------------------------------------------------|-------|-----|-------|------|------|------|------|------|------|------|
| IGKC_HUMAN    | Ig kappa chain C region                                                           | 11.6  | 5.5 | 267.7 | 32.1 | 1.54 | 0.83 | 0.8  | 1.69 | 0.51 | 1.10 |
| ITIH4_HUMAN   | Inter-alpha-trypsin inhibitor heavy chain H4                                      | 103.3 | 6.5 | 86.5  | 2.5  | 0.51 | 0.73 | 0.58 | 0.67 | 1.14 | 1.32 |
| K1C10_HUMAN   | Keratin, type I cytoskeletal 10                                                   | 58.8  | 5.0 | 220.0 | 11.6 | 0.66 | 1.04 | 1.79 | 2.31 | 3.34 | 3.53 |
| K1C17_HUMAN   | Keratin, type I cytoskeletal 17 2                                                 | 48.1  | 4.8 | 63.6  | 4.6  | 0.87 | 1.28 | 1.79 | 2.11 | 2.06 | 2.44 |
| K1C9_HUMAN    | Keratin, type I cytoskeletal 9                                                    | 62.0  | 5.0 | 120.2 | 7.9  | 0.68 | 0.97 | 1.41 | 1.73 | 2.08 | 2.55 |
| K22E_HUMAN    | Keratin, type II cytoskeletal 2 epidermal                                         | 65.4  | 8.9 | 244.8 | 11.6 | 0.64 | 0.99 | 1.7  | 2.35 | 2.67 | 3.68 |
| K2C1_HUMAN    | Keratin, type II cytoskeletal 1                                                   | 66.0  | 8.8 | 550.8 | 17.1 | 0.56 | 0.91 | 1.49 | 2.21 | 2.67 | 3.96 |
| LAC3_HUMAN    | Ig lambda-3 chain C regions                                                       | 11.2  | 7.7 | 92.0  | 28.3 | 0.71 | 0.95 | 0.79 | 2.8  | 1.11 | 3.94 |
| LCAT_HUMAN    | Phosphatidylcholine-sterol acyltransferase                                        | 49.5  | 5.7 | 245.3 | 13.4 | 0.28 | 0.41 | 2.45 | 2.17 | 8.76 | 7.73 |
| LRIQ1_HUMAN   | Leucine-rich repeat and IQ domain-containing protein 1                            | 199.2 | 5.8 | 34.2  | 0.8  | 0.56 | 1.67 | 0.29 | NA   | 0.52 | NA   |
| LYAM1_HUMAN   | L-selectin OS                                                                     | 42.2  | 6.2 | 40.1  | 2.2  | 0.43 | 0.51 | 1.51 | 1.46 | 3.55 | 3.42 |
| MAT1_HUMAN    | CDK-activating kinase assembly factor MAT1                                        | 35.8  | 5.7 | 34.8  | 2.6  | 0.59 | 0.85 | 0.71 | NA   | 1.21 | NA   |
| NALP2_HUMAN   | NACHT, LRR and PYD domains-containing protein 2                                   | 120.4 | 5.7 | 34.3  | 0.7  | 0.92 | 0.94 | 1.28 | 1.08 | 1.38 | 1.17 |
| NEB1_HUMAN    | Neurabin-1                                                                        | 123.3 | 4.9 | 31.3  | 0.6  | 0.73 | 1.09 | 0.89 | NA   | 1.21 | NA   |
| Lp-PLA2_HUMAN | Platelet-activating factor acetylhydrolase                                        | 50.0  | 7.9 | 38.8  | 1.8  | 0.84 | 0.88 | 1.29 | NA   | 1.54 | NA   |
| PCYOX_HUMAN   | Prenylcysteine oxidase 1                                                          | 56.6  | 5.8 | 350.0 | 14.5 | 0.51 | 0.68 | 0.8  | 0.71 | 1.57 | 1.40 |
| PEDF_HUMAN    | Pigment epithelium-derived factor                                                 | 46.3  | 6.0 | 48.9  | 3.3  | 0.61 | 1.75 | 0.26 | NA   | 0.43 | NA   |
| PGPS1_HUMAN   | CDP-diacylglycerol--glycerol-3-phosphate 3-phosphatidyltransferase, mitochondrial | 62.7  | 9.8 | 30.5  | 2.0  | 0.63 | 1.20 | 0.77 | NA   | 1.21 | NA   |
| PLTP_HUMAN    | Phospholipid transfer protein                                                     | 54.7  | 6.6 | 125.9 | 8.7  | 0.57 | 0.54 | 1.12 | 1.45 | 1.97 | 2.56 |
| PLXA3_HUMAN   | Plexin-A3                                                                         | 207.6 | 7.2 | 37.5  | 0.4  | 1.27 | 0.47 | 1.26 | NA   | 1.00 | NA   |

|             |                                                                               |        |      |       |      |      |      |      |      |      |      |
|-------------|-------------------------------------------------------------------------------|--------|------|-------|------|------|------|------|------|------|------|
| PON1_HUMAN  | Serum paraoxonase/arylesterase 1                                              | 39.7   | 5.0  | 291.6 | 16.9 | 0.41 | 0.57 | 2.06 | 4.09 | 5.00 | 9.89 |
| PON3_HUMAN  | Serum paraoxonase/lactonase 3                                                 | 39.6   | 5.1  | 243.5 | 15.3 | NA   | NA   | NA   | 3.56 | NA   | NA   |
| PRKRA_HUMAN | Interferon-inducible double stranded RNA-dependent protein kinase activator A | 34.4   | 9.6  | 37.1  | 4.8  | 0.68 | 0.99 | 1.05 | NA   | 1.55 | NA   |
| REV1_HUMAN  | DNA repair protein REV1                                                       | 138.2  | 9.5  | 36.6  | 0.8  | 1.09 | 0.82 | 1.07 | NA   | 0.98 | NA   |
| RPA34_HUMAN | DNA-directed RNA polymerase I subunit RPA34                                   | 55.0   | 9.4  | 34.5  | 2.4  | 0.71 | 0.57 | 0.58 | NA   | 0.82 | NA   |
| RUFY2_HUMAN | RUN and FYVE domain-containing protein 2                                      | 75.0   | 6.1  | 69.4  | 1.1  | 0.97 | 1.14 | 1.14 | 1.1  | 1.17 | 1.13 |
| SAA_HUMAN   | Serum amyloid A protein                                                       | 13.5   | 6.4  | 242.2 | 29.5 | 0.91 | 1.12 | 0.7  | 0.81 | 0.76 | 0.89 |
| SAA4_HUMAN  | Serum amyloid A-4 protein                                                     | 14.7   | 9.8  | 639.7 | 30.0 | 2.09 | 0.96 | 0.68 | 0.75 | 0.33 | 0.36 |
| SIA8C_HUMAN | Sia-alpha-2,3-Gal-beta-1,4-GlcNAc-R:alpha 2,8-sialyltransferase               | 43.9   | 10.1 | 34.3  | 2.9  | 1.18 | 0.60 | 1.13 | NA   | 0.96 | NA   |
| SYNE1_HUMAN | Nesprin-1                                                                     | 1010.4 | 5.3  | 77.8  | 0.1  | 1.02 | 0.76 | 0.97 | 1.52 | 0.95 | 1.48 |
| TRNK1_HUMAN | TPR and ankyrin repeat-containing protein 1                                   | 336.0  | 6.3  | 31.3  | 0.3  | 1.16 | 1.45 | 1.29 | 1.19 | 1.11 | 1.03 |
| TRY1_HUMAN  | Trypsin-1                                                                     | 26.5   | 6.1  | 140.1 | 4.0  | 1.14 | 1.19 | 0.9  | 1.13 | 0.78 | 0.99 |
| TTHY_HUMAN  | Transthyretin                                                                 | 15.9   | 5.4  | 308.6 | 52.4 | 0.63 | 0.60 | 2.27 | 2.36 | 3.51 | 3.74 |
| TXLNB_HUMAN | Beta-taxilin                                                                  | 76.5   | 4.8  | 33.2  | 1.5  | NA   | NA   | NA   | 1.92 | NA   | NA   |
| UT14C_HUMAN | U3 small nucleolar RNA-associated protein 14 homolog C                        | 87.1   | 6.7  | 30.2  | 1.4  | NA   | NA   |      | 1.48 |      | NA   |
| VTNC_HUMAN  | Vitronectin                                                                   | 54.3   | 5.5  | 258.8 | 15.1 | NA   | NA   | NA   | 3.18 | NA   | NA   |
| YK041_HUMAN | Putative uncharacterized protein ENSP00000334305                              | 84.9   | 8.8  | 30.4  | 1.3  | 1.12 | 0.81 | 1.02 | NA   | 0.91 | NA   |
| ZEP1_HUMAN  | Zinc finger protein 40                                                        | 296.7  | 8.9  | 32.8  | 0.4  | 0.79 | 1.14 | 0.78 | NA   | 0.99 | NA   |
| ZN175_HUMAN | Zinc finger protein 175                                                       | 81.6   | 10.1 | 30.4  | 1.1  | NA   | NA   | NA   | 4.84 | NA   | NA   |

MW, molecular weight; pI, isoelectric point; SC, sequence coverage.

**Table S-2.** Molecular functions of the iTRAQ-labeled proteins identified by nanoLC-MS/MS

| Function             | Gene            | Protein                                      | H1/H3 | H2/H3 | H4/H3 | H5/H3 |
|----------------------|-----------------|----------------------------------------------|-------|-------|-------|-------|
| Lipid metabolism     |                 |                                              |       |       |       |       |
|                      | <i>apoAI</i>    | Apolipoprotein A-I                           | 0.85  | 0.90  | 1.09  | 1.36  |
|                      | <i>apoAII</i>   | Apolipoprotein A-II                          | 0.43  | 1.47  | 0.29  | 0.52  |
|                      | <i>apoB</i>     | Apolipoprotein B-100                         | 0.92  | 0.65  | 0.71  | 0.95  |
|                      | <i>apoC1</i>    | Apolipoprotein C-I                           | 3.50  | 0.98  | 0.93  | 1.23  |
|                      | <i>apoC2</i>    | Apolipoprotein C-II                          | 0.35  | 2.33  | 0.51  | 0.85  |
|                      | <i>apoC3</i>    | Apolipoprotein C-III                         | 0.25  | 1.12  | 0.23  | 0.69  |
|                      | <i>apoC4</i>    | Apolipoprotein C-IV                          | 2.44  | 0.95  | 0.9   | 1.21  |
|                      | <i>apoD</i>     | Apolipoprotein D                             | 0.44  | 1.67  | 0.34  | 0.59  |
|                      | <i>apoE</i>     | Apolipoprotein E                             | 0.57  | 0.56  | 1.38  | 1.51  |
|                      | <i>apoF</i>     | Apolipoprotein F                             | 0.47  | 1.08  | 0.99  | 3.86  |
|                      | <i>CLU\apoJ</i> | Clusterin\Apolipoprotein J                   | NA    | 0.83  | 1.54  | 2.82  |
|                      | <i>apoL1</i>    | Apolipoprotein L1                            | 1.28  | 0.87  | 0.78  | 0.8   |
|                      | <i>apoM</i>     | Apolipoprotein M                             | 0.37  | 0.71  | 1.12  | 1.26  |
|                      | <i>PLTP</i>     | Phospholipid transfer protein                | 0.57  | 0.54  | 1.12  | 1.45  |
|                      | <i>LCAT</i>     | Phosphatidylcholine-sterol acyltransferase   | 0.28  | 0.41  | 2.45  | 2.17  |
|                      | <i>Lp-PLA2</i>  | Lipoprotein-associated phospholipase A2      | 0.84  | 0.88  | 1.29  | NA    |
|                      | <i>PON1</i>     | Serum paraoxonase 1                          | 0.41  | 0.57  | 2.06  | 4.09  |
|                      | <i>PON3</i>     | Serum paraoxonase 3                          | NA    | NA    | NA    | 3.56  |
|                      | <i>LPA</i>      | Apolipoprotein(a)                            | NA    | NA    | NA    | 3.19  |
| Antioxidant          |                 |                                              |       |       |       |       |
|                      | <i>apoAI</i>    | Apolipoprotein A-I                           | 0.85  | 0.90  | 1.09  | 1.36  |
|                      | <i>apoM</i>     | Apolipoprotein M                             | 0.37  | 0.71  | 1.12  | 1.26  |
|                      | <i>LCAT</i>     | Phosphatidylcholine-sterol acyltransferase   | 0.28  | 0.41  | 2.45  | 2.17  |
|                      | <i>Lp-PLA2</i>  | Lipoprotein-associated phospholipase A2      | 0.84  | 0.88  | 1.29  | NA    |
|                      | <i>PON1</i>     | Serum paraoxonase 1                          | 0.41  | 0.57  | 2.06  | 4.09  |
|                      | <i>PON3</i>     | Serum paraoxonase 3                          | NA    | NA    | NA    | 3.56  |
| Complement           |                 |                                              |       |       |       |       |
|                      | <i>CLU\apoJ</i> | Clusterin\Apolipoprotein J                   | NA    | 0.83  | 1.54  | 2.82  |
|                      | <i>C3</i>       | Complement C3                                | 0.57  | 0.76  | 0.95  | 1.19  |
|                      | <i>C4A</i>      | Complement C4-A                              | NA    | NA    | NA    | 2.66  |
|                      | <i>VTN</i>      | Vitronectin                                  | NA    | NA    | NA    | 3.18  |
| Acute-phase response |                 |                                              |       |       |       |       |
|                      | <i>SAA4</i>     | Serum amyloid A-4 protein                    | 2.09  | 0.96  | 0.68  | 0.75  |
|                      | <i>SAA1</i>     | Serum amyloid A protein                      | 0.91  | 1.12  | 0.7   | 0.81  |
|                      | <i>ITIH4</i>    | Inter-alpha-trypsin inhibitor heavy chain H4 | 0.51  | 0.73  | 0.58  | 0.67  |
|                      | <i>SERPINA1</i> | Alpha-1-antitrypsin                          | 0.61  | 1.49  | 1     | 1.39  |
|                      | <i>SERPINF2</i> | Alpha-2-antiplasmin                          | 0.40  | 0.82  | 1.1   | 1.18  |

|                    |                 |                                              |      |      |      |      |
|--------------------|-----------------|----------------------------------------------|------|------|------|------|
|                    | <i>SERPINC1</i> | Antithrombin-III                             | 0.84 | 0.98 | 1.65 | NA   |
|                    | <i>ORM2</i>     | Alpha-1-acid glycoprotein 2                  | 0.71 | 0.84 | 2.02 | 2.5  |
|                    | <i>HP</i>       | Haptoglobin                                  | 0.55 | 0.68 | 1.46 | 1.47 |
|                    | <i>HPR</i>      | Haptoglobin-related protein                  | 0.41 | 0.63 | 1.72 | 1.58 |
|                    | <i>TTR</i>      | Transthyretin                                | 0.63 | 0.60 | 2.27 | 2.36 |
| Protease inhibitor |                 |                                              |      |      |      |      |
|                    | <i>ITIH4</i>    | Inter-alpha-trypsin inhibitor heavy chain H4 | 0.51 | 0.73 | 0.58 | 0.67 |
|                    | <i>SERPINA1</i> | Alpha-1-antitrypsin                          | 0.61 | 1.49 | 1    | 1.39 |
|                    | <i>SERPINF2</i> | Alpha-2-antiplasmin                          | 0.40 | 0.82 | 1.1  | 1.18 |
|                    | <i>SERPINC1</i> | Antithrombin-III                             | 0.84 | 0.98 | 1.65 | NA   |
|                    | <i>AGT</i>      | Angiotensinogen                              | 0.36 | 0.95 | 1.27 | 1.31 |
| Immune response    |                 |                                              |      |      |      |      |
|                    | <i>IGHA1</i>    | Ig alpha-1 chain C region                    | 0.62 | 0.78 | 0.97 | 1.31 |
|                    | <i>IGHG1</i>    | Ig gamma-1 chain C region                    | 1.10 | 1.03 | 1.37 | 1.17 |
|                    | <i>IGHG2</i>    | Ig gamma-2 chain C region                    | 1.23 | 1.35 | 1.34 | 1.32 |
|                    | <i>IGKC</i>     | Ig kappa chain C region                      | 1.54 | 0.83 | 0.8  | 1.69 |

Colors indicate the relative abundance of each protein: green (low), yellow (medium), and red (high). NA,

not available.



## EXPERIMENTAL SECTION

**Protein Digestion and iTRAQ Labeling.** HDL subfractions H1 through H5 were individually dissolved in 25 mM triethylammonium bicarbonate and heated to 90°C for 20 min. The denatured proteins were reduced and alkylated by using solutions provided in the iTRAQ experiment kit. Trypsin was added to the protein solution at an enzyme-to-substrate ratio of 1:50 (wt/wt), and the mixture was incubated for 12 hours at 37°C. Digested HDL samples were then labeled with iTRAQ reagents according to the manufacturer's protocol. The first comparison experiment consisted of subfractions H1 through H4, which were labeled with reagents 114 through 117, respectively. The second experiment consisted of subfractions H3 and H5, which were labeled with reagents 114 and 117, respectively. For each experiment, 20  $\mu$ L of label reagent was applied to 30  $\mu$ g of subfraction digest. Samples in each comparison experiment were mixed and dried by using a centrifugal concentrator (miVac Duo Concentrator; Genevac, Stone Ridge, NY). Before nanoflow liquid chromatography tandem mass spectrometry (nanoLC-MS/MS) was performed, the samples were desalted with C18 SPE cartridges (Waters, Milford, MA).

**NanoLC-MS/MS.** NanoLC-MS/MS was performed by using a nanoflow, ultra-high performance liquid chromatography system (UltiMate 3000 RSLCnano system, Dionex, Amsterdam, Netherlands) coupled with a hybrid Q-TOF mass spectrometer (maXis impact, Bruker Daltonics, Billerica, MA). Samples were injected into a home-made tunnel-frit trap column (C18, 5  $\mu$ m, 180  $\mu$ m x 20 mm) with a flow rate of 10  $\mu$ L/min for a duration of 4 min.<sup>1</sup> The trapped analytes were separated by using a commercial analytical column (Acclaim PepMap C18, 2  $\mu$ m, 100 Å, 75  $\mu$ m x 250 mm, Thermo Scientific) with a flow rate of 300 nL/min. An acetonitrile/water gradient of 1% to 35% within 76 min was used for peptide separation. For MS

detection, peptides that had a charge of 2+, 3+, or 4+ and an intensity greater than 50 counts were selected for data-dependent acquisition, which was set to 1 full MS scan (400-1600 m/z) with 1 Hz and was switched to 10 product ion scans (100-1990 m/z) with 5 Hz.

**Protein Identification and Quantification.** NanoLC-MS/MS spectra were deisotoped, centroided, and converted to .xml files by using DataAnalysis software (version 4.1, Bruker Daltonics). To identify proteins, the mass spectra obtained were compared to those in the SwissPort database (release 51.0) by using the MASCOT search algorithm (version 2.2.07). The search parameters for MASCOT included peptide and MS/MS mass tolerance set to 0.05 Da, taxonomy–human, enzyme–trypsin, fixed modification–methylthio (Cys), variable modification–oxidation (Met), deamidation (Asn/Gln), and iTRAQ4plex (Lys/Tyr/N-term). Peptides were identified if their MASCOT individual ion score was higher than 30. The protein ratio with iTRAQ labeling was processed and calculated by using ProteinScape (Bruker Daltonics). Gene ontology analysis (<http://david.abcc.ncifcrf.gov/>)<sup>2-3</sup> was used to classify the detected proteins on the basis of molecular function.

**References**

- (1) Chen, C. J.; Chen, W. Y.; Tseng, M. C.; Chen, Y. R. *Anal. Chem.* **2012**, *84*, 297-303.
- (2) Huang da, W.; Sherman, B. T.; Lempicki, R. A. *Nat Protoc.* **2009**, *4*, 44-57.
- (3) Huang da, W.; Sherman, B. T.; Lempicki, R. A. *Nucleic Acids Res.* **2009**, *37*, 1-13.
